# Supplementary material
Source: Springer Nature journal article supplement (https://www.springermedizin.de/resource/supplementary/12911_2012_608_MOESM5_ESM.pdf/9525816)

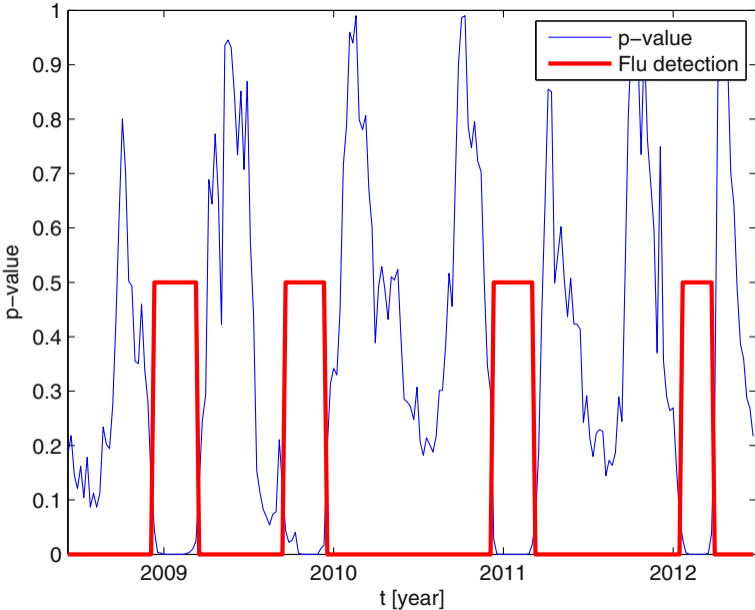

Supplement: MOESM5 [file 9525816]
